# Supplementary material for: A universal method for the determination of polysorbate 80 in monoclonal antibodies and novel protein therapeutic formulations
Source: Royal Society of Chemistry journal article supplement (doi:10.1039/c7ay02537h), 2017-12-26

**Supplement figure 1: Specificity evaluation of the PS80 in protein formulations.** Example chromatogram of ELSD signals from, (A) protein formulation (150 mg/ml) with no PS80 and injection volume of 50  $\mu$ l, (B) protein formulation (150 mg/ml) with 0.2 mg/ml PS80, (C) protein formulation (150 mg/ml) with 0.5 mg/ml PS80, (D) protein formulation (5 mg/ml) with no PS80 (e) protein formulation (5 mg/ml) with 0.2 mg/ml PS80, and (F) protein formulation (5 mg/ml) with 0.5 mg/ml PS80. Injection volume for A and D: 50  $\mu$ l; Injection volume for B, C, E, and F: 25  $\mu$ l.

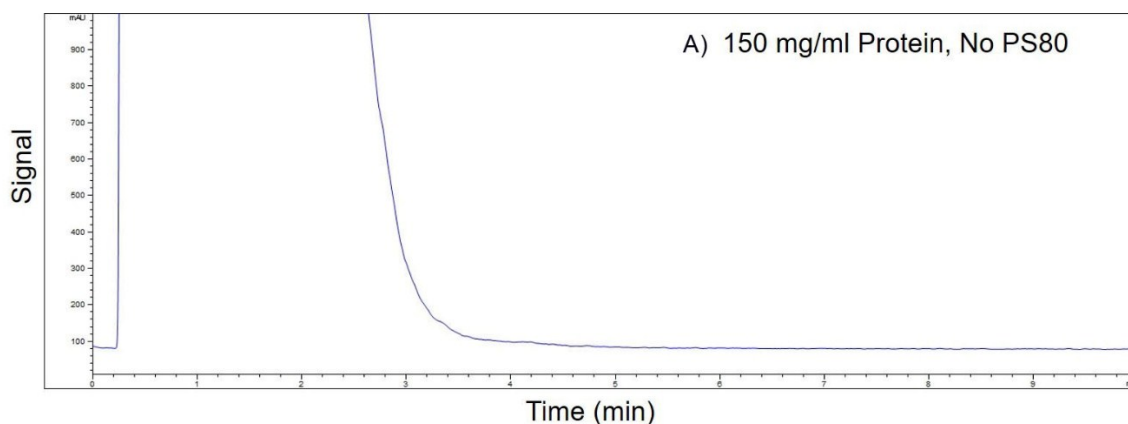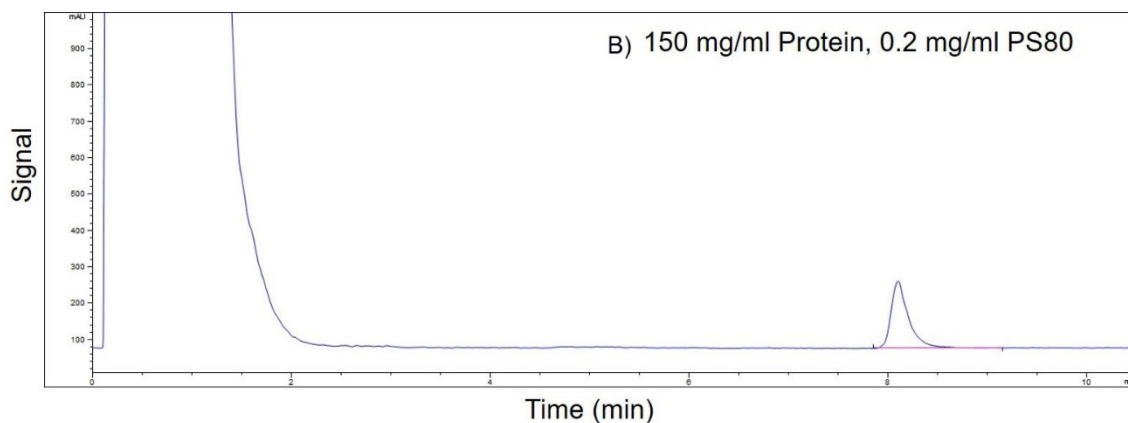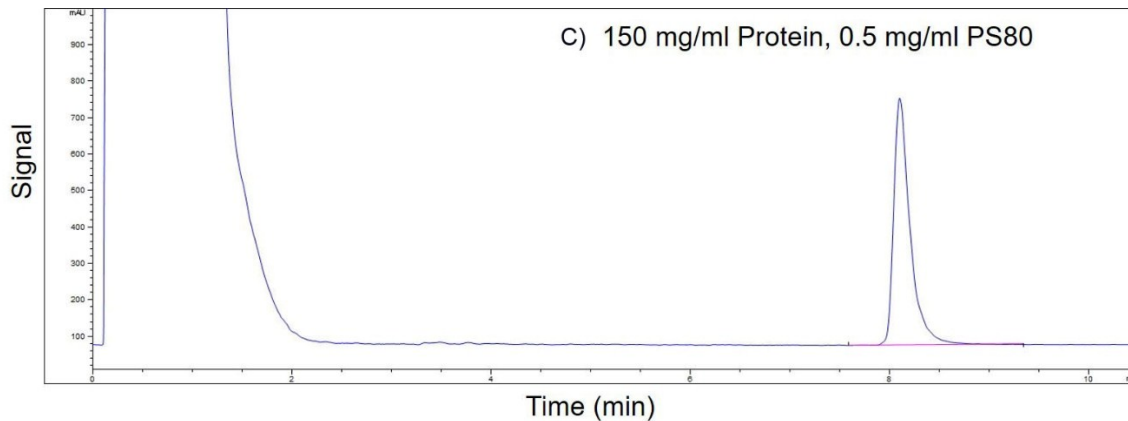

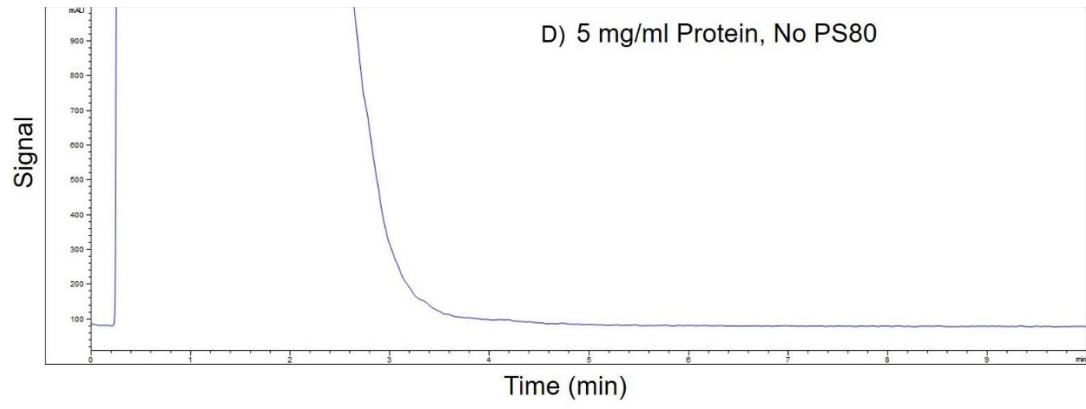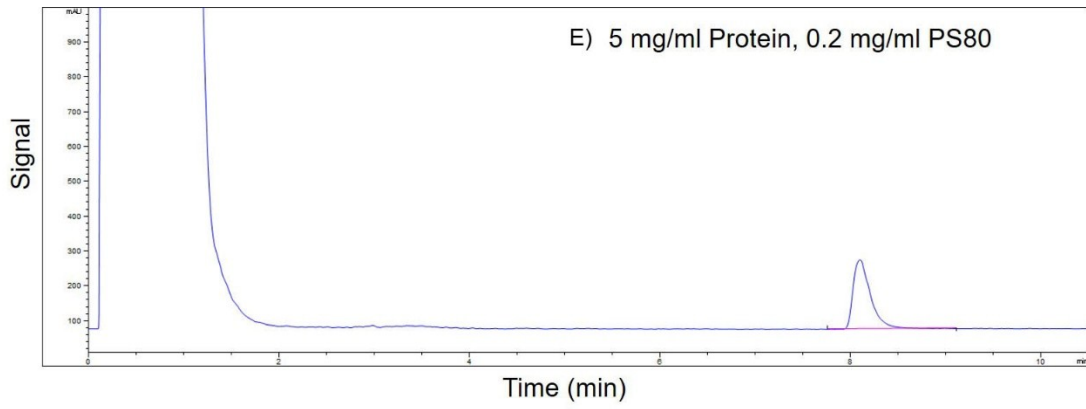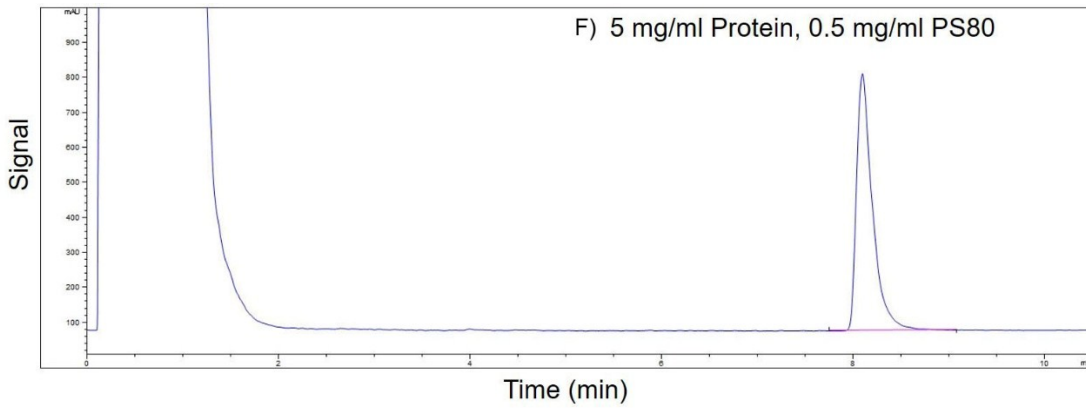

Supplement: c7ay02537h1.pdf [file c7ay02537h1.pdf]
